# Supplementary material for: Template free synthesis of dendritic silver nanostructures and their application in surface-enhanced Raman scattering
Source: Royal Society of Chemistry journal article supplement (doi:10.1039/c4ra10113h), 2014-10-13
Supplement: c4ra10113h1.pdf [file c4ra10113h1.pdf]

## Template Free Synthesis of Dendritic Silver Nanostructure and Its Application to Surface Enhanced Raman Scattering

Mohammad Mydul Alam, Wei Ji, Hom Nath Luitel, Yukihiro Ozaki, Takanori Watari, Kenichi  
Nakashima

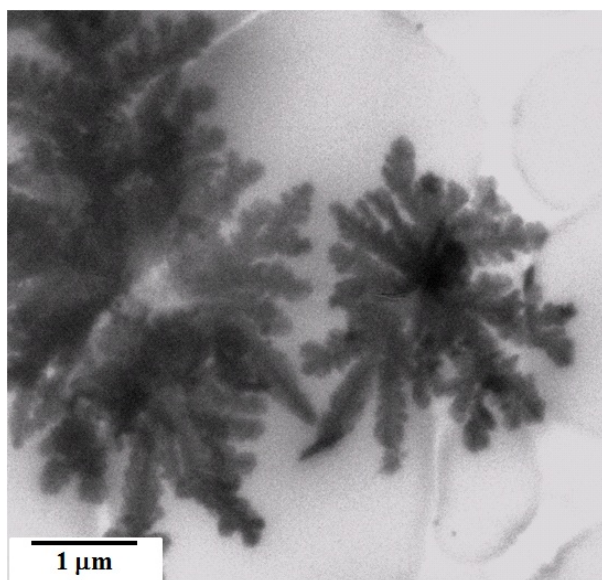

**Fig. S1.** TEM image of a dendritic silver nanostructure.

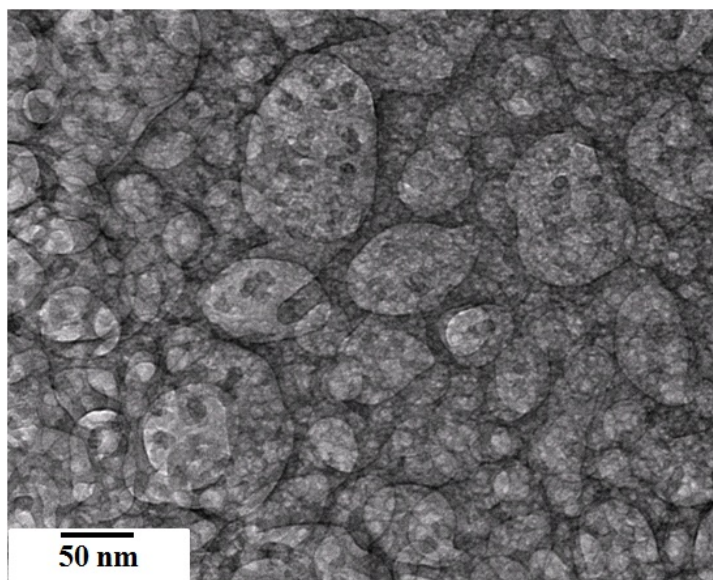

**Fig. S2.** TEM image showing breakdown of dendritic silver nanostructure after centrifugation at 12000 rpm for 20 min.

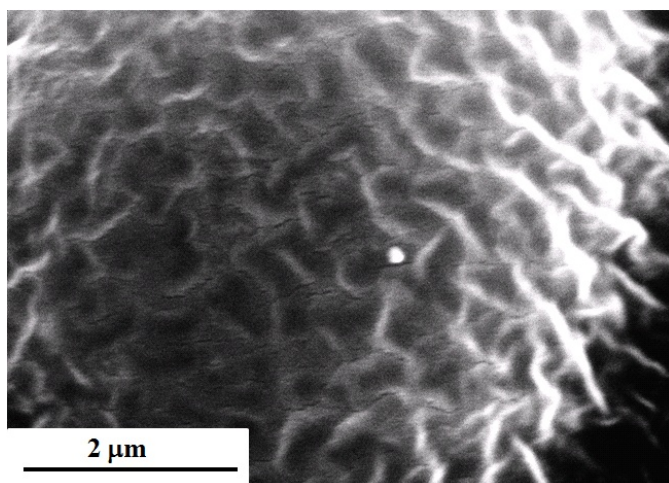

**Fig. S3.** SEM image of the dendritic silver nanostructure.

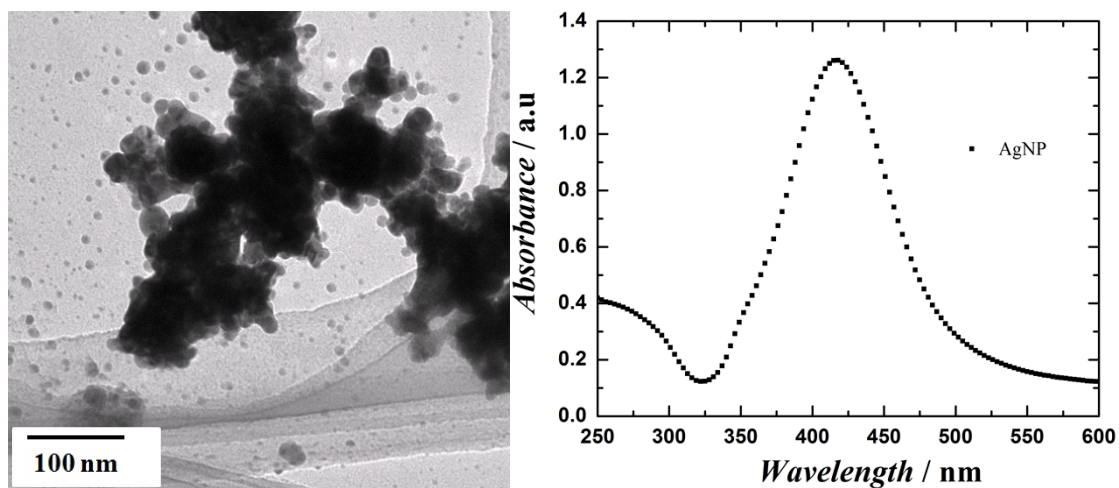

**Fig. S4.** TEM image of silver nanoparticles (AgNP) and corresponding UV-vis spectrum when the reducing agent was  $\text{NaBH}_4$ .

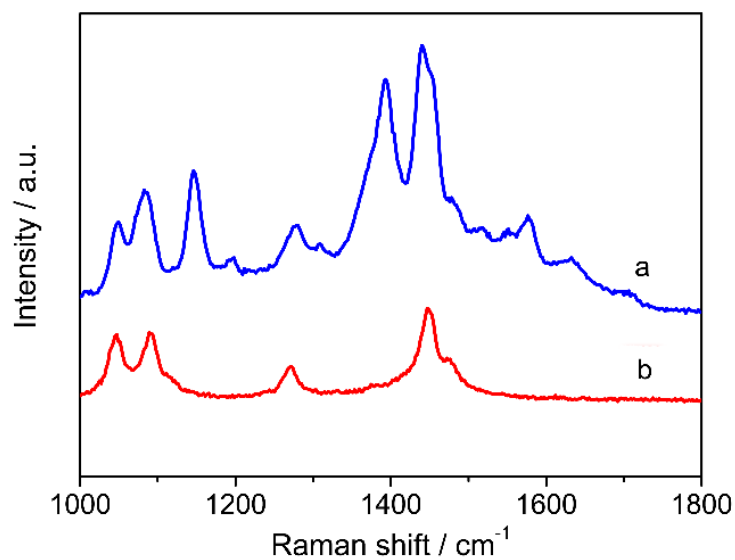

**Fig. S5.** (a) SERS spectrum of PATP molecules ( $1 \times 10^{-7}$  M) on dendritic Ag NPs and (b) Raman spectrum of ethanol molecules.
